# Supplementary material for: Functionalized and tip-open carbon nanotubes for high-performance symmetric supercapacitors
Source: Royal Society of Chemistry journal article supplement (doi:10.1039/d1dt02055b), 2021-01-01
Supplement: d1dt02055b1.pdf [file d1dt02055b1.pdf]

## Functionalization and Tip-open Carbon Nanotubes for High-Performance Symmetric Supercapacitor

Yaxiong Zhang<sup>a, \*</sup>, Erqing Xie<sup>a, \*</sup>

<sup>a</sup>Key Laboratory for Magnetism and Magnetic Materials of the Ministry of Education, School of Physical Science and Technology, Lanzhou University, Lanzhou 730000, China

\*Corresponding authors

E-mail: zyxiong@lzu.edu.cn (Y. Zhang); xieeq@lzu.edu.cn (E. Xie)

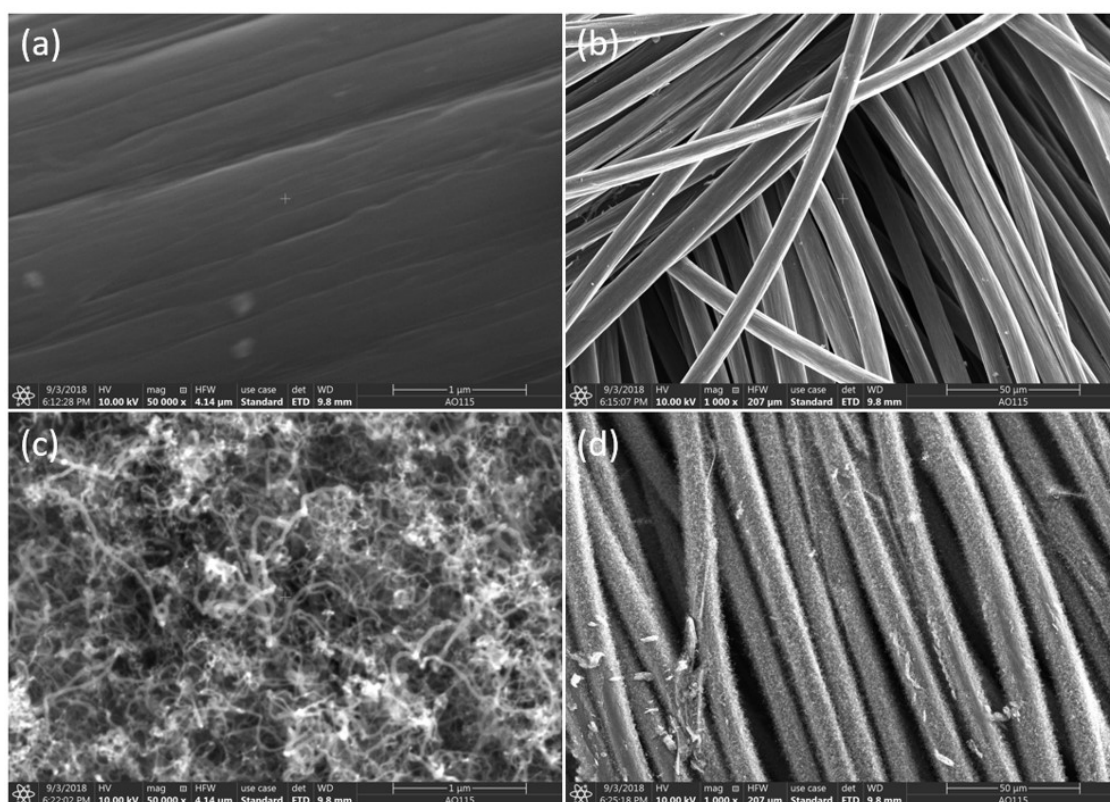

**Figure S1.** The SEM images of CC at (a) high and (b) low magnification, and The SEM images of CCC at (c) high and (d) low magnification.

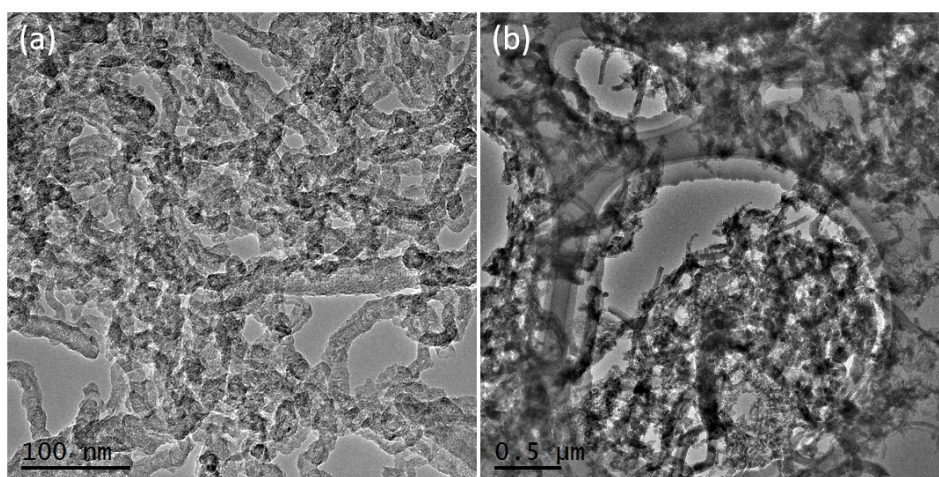

**Figure S2.** The TEM images of (a) CCC and (b) FTO-CNTs.

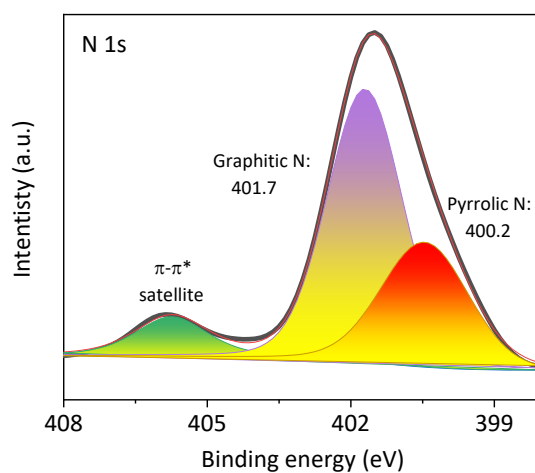

**Figure S3.** The fine XPS spectra of N 1s.

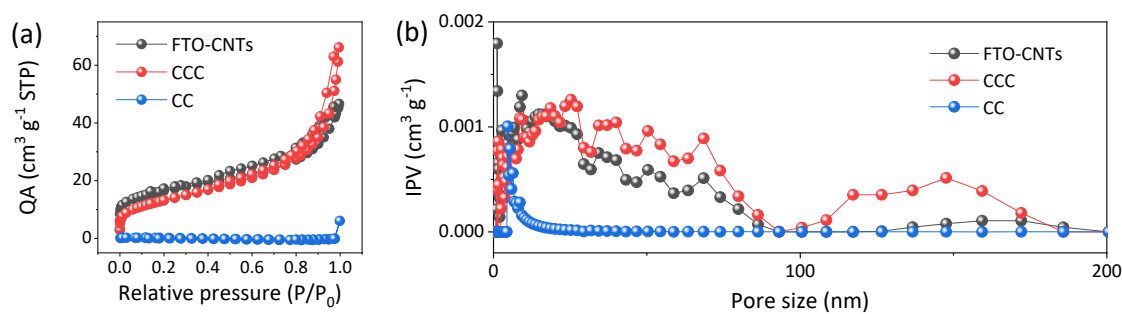

**Figure S4.** (a)  $N_2$  adsorption and desorption isotherms (QA, Quantity Adsorbed), and (b) the pore size distribution (IPV, Inc. Pore Volume) of CC, CCC and FTO-CNTs.

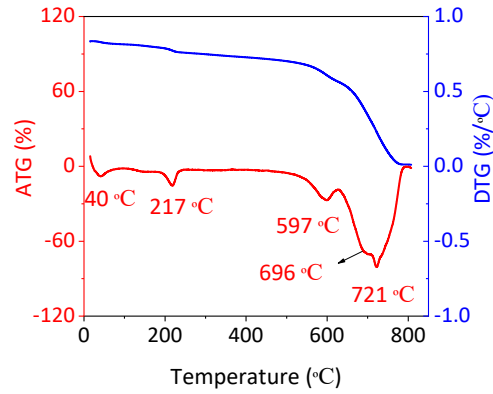

**Figure S5.** TGA mass loss and its derivative of FTO-CNTs.

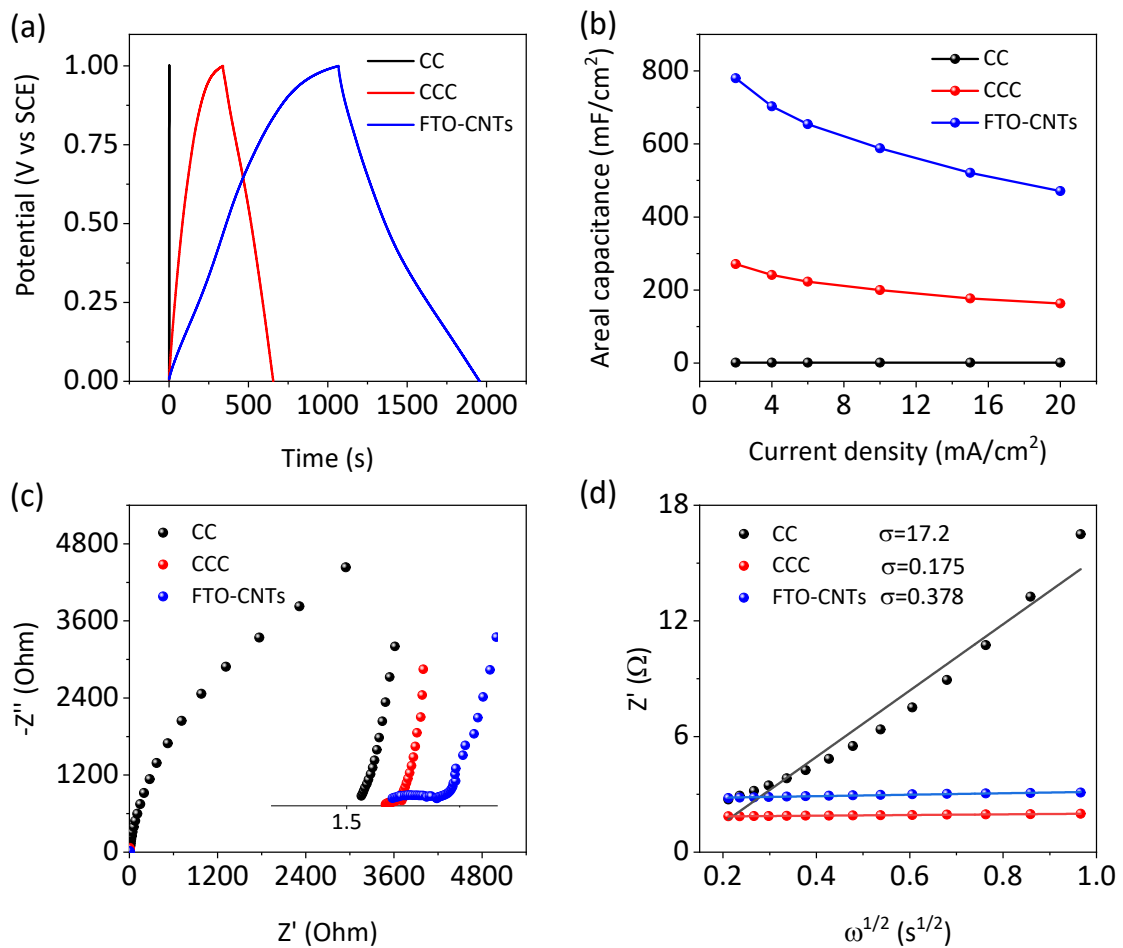

**Figure S6.** (a) the GCD curves at current density of 1 mA/cm<sup>2</sup>, (b) the areal capacitance at different current densities, (c) Nyquist plots (the inset shows the high frequency part), (d) the plots of linear fitted  $Z'$  versus  $\omega^{-1/2}$  plots at high frequency regime, and the derived Warburg coefficient  $\sigma$  of CC,

CCC and FTO-CNTs in electrolyte of 5 M LiCl.

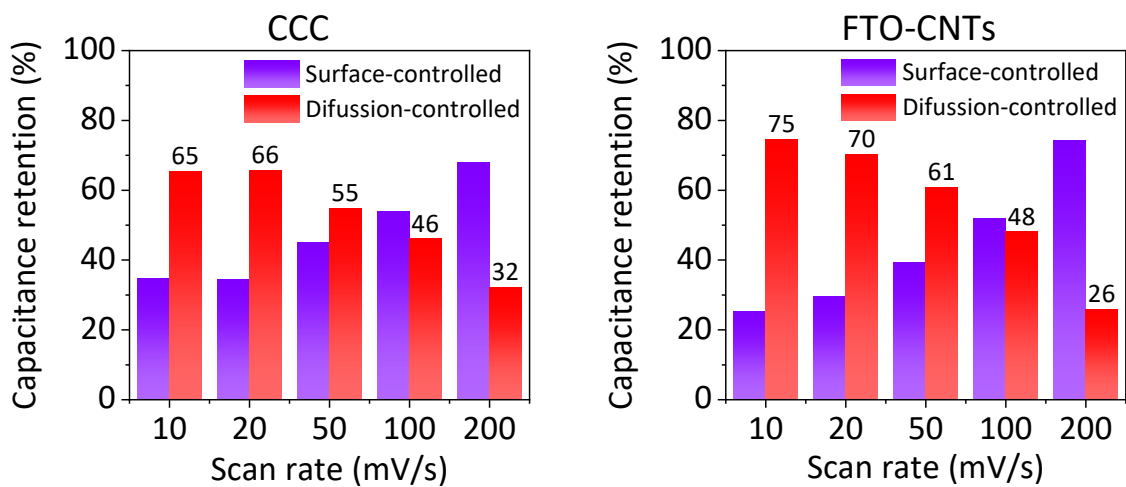

**Figure S7.** The capacitance contribution at different scan rates of (a) CCC, and (b) FTO-CNTs.

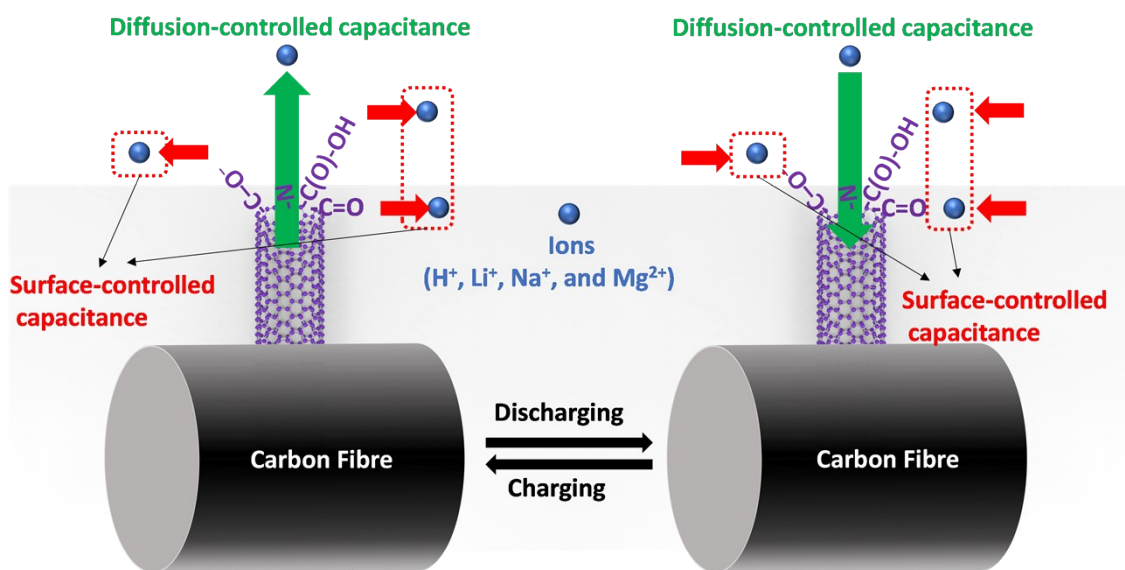

**Figure S8.** The schematic of the charging/discharging process of the FTO-CNTs.

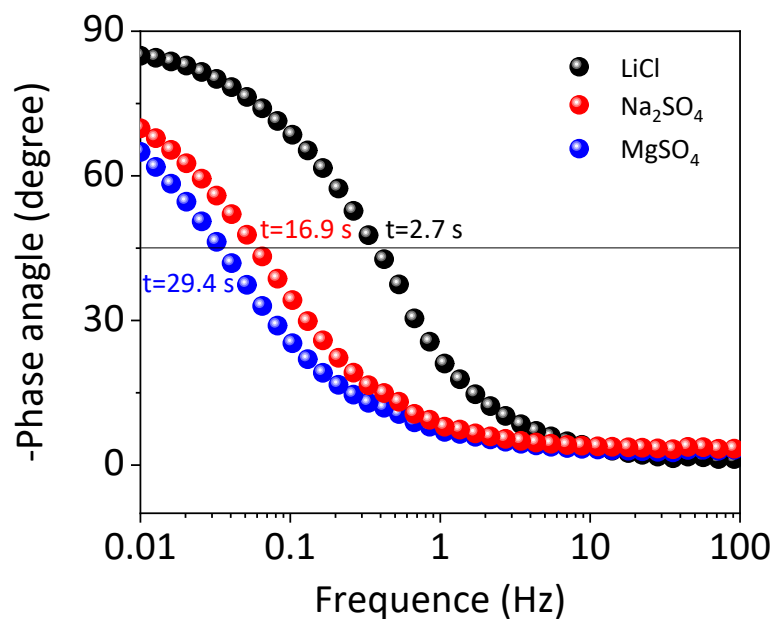

**Figure S9.** The Bode plot of FTO-CNTs at different electrolyte.

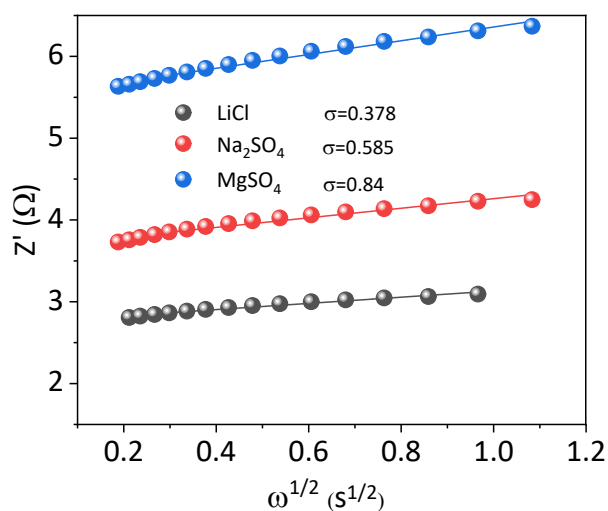

**Figure S10.** the plots of linear fitted  $Z'$  versus  $\omega^{-1/2}$  plots at high frequency regime, and the derived Warburg coefficient  $\sigma$  of FTO-CNTs in different electrolytes.

Table S1. Information of alkaline and the alkaline-earth metal cations.

| Ion specie    | Ion size ( $\text{\AA}$ ) | Hydrated ion size ( $\text{\AA}$ ) |
|---------------|---------------------------|------------------------------------|
| $\text{Li}^+$ | 0.69                      | 6                                  |

|                  |      |   |
|------------------|------|---|
| Na <sup>+</sup>  | 1.02 | 4 |
| Mg <sup>2+</sup> | 0.66 | 8 |

Table S2. Comparison of the electrochemical performance for FTO-CNTs with the previous reports on similar materials.

| Material                                                                           | Capacitance (mF/cm <sup>2</sup> ) | Current density (scan rate) | Energy density                                         | Power density                                       | Ref.      |
|------------------------------------------------------------------------------------|-----------------------------------|-----------------------------|--------------------------------------------------------|-----------------------------------------------------|-----------|
| rGO/Ni pattern                                                                     | 12.5                              | 5 mV/s                      | 2.25 mWh/cm <sup>3</sup>                               | 40 mW/cm <sup>3</sup>                               | 1         |
| CNT-incorporated tin-oxide                                                         | 21                                | 10 mV/s                     | -                                                      | -                                                   | 2         |
| dc-pulse nitrogen atmospheric-pressure plasma jet calcined CNT-coated carbon cloth | 5.89                              | 2 mV/s                      | -                                                      | -                                                   | 3         |
| CNT-PDMS sponge                                                                    | 13.8                              | 5 mV/s                      | -                                                      | -                                                   | 4         |
| PPy@CNTs@urethane elastic fiber                                                    | 69                                | 5 mV/s                      | 0.47 mWh/cm <sup>3</sup>                               | 10.18 mW/cm <sup>3</sup>                            | 5         |
| MnO <sub>2</sub> // $\alpha$ -Fe <sub>2</sub> O <sub>3</sub> /C solid-state ASCs   | 75.3                              | 1 mA/cm <sup>2</sup>        | 0.56 mWh/cm <sup>3</sup>                               | 16.8 mW/cm <sup>3</sup>                             | 6         |
| fCC-PANI array-rGO                                                                 | 197                               | 0.1 mA/cm <sup>2</sup>      | 0.22 mWh/cm <sup>3</sup>                               | 171.22 mW/cm <sup>3</sup>                           | 7         |
| Cotton/graphene/polyaniline                                                        | 246                               | 5 mV/s                      | 9.74 $\mu$ Wh/cm <sup>2</sup>                          | 1146.3 $\mu$ W/cm <sup>2</sup>                      | 8         |
| N-doped porous carbon cloth                                                        | 130                               | 1 mA/cm <sup>2</sup>        | 2.03 mWh/cm <sup>3</sup>                               | 2.03 mW/cm <sup>3</sup>                             | 9         |
| CNT/polypyrrole                                                                    | 132.4                             | 5 mV/s                      | 32 $\mu$ Wh/cm <sup>2</sup>                            | 0.25 mW/cm <sup>2</sup>                             | 10        |
| FTO-CNTs                                                                           | 284                               | 1 mA/cm <sup>2</sup>        | 1.3 mWh/cm <sup>3</sup><br>39 $\mu$ Wh/cm <sup>2</sup> | 309.1 mW/cm <sup>3</sup><br>10.2 mW/cm <sup>2</sup> | Our works |

1. Y. Chen, B. Xu, J. Xu, J. Wen, T. Hua and C.-W. Kan, *J. Power Sources*, 2019, **420**, 82-87.
2. H. Abdollahi, M. Samkan, M. A. Mohajerzadeh, Z. Sanaee and S. Mohajerzadeh, *J. Mater. Sci.: Mater. El.*, 2018, **29**, 7468-7479.
3. F.-H. Kuok, K.-Y. Kan, I.-S. Yu, C.-W. Chen, C.-C. Hsu, I. C. Cheng and J.-Z. Chen, *Appl. Surf. Sci.*, 2017, **425**, 321-328.
4. Y. Song, H. Chen, Z. Su, X. Chen, L. Miao, J. Zhang, X. Cheng and H. Zhang, *Small*, 2017, **13**, 1702091.
5. J. Sun, Y. Huang, C. Fu, Z. Wang, Y. Huang, M. Zhu, C. Zhi and H. Hu, *Nano Energy*, 2016, **27**, 230-237.

6. D. Chen, S. Zhou, H. Quan, R. Zou, W. Gao, X. Luo and L. Guo, *Chem. Eng. J.*, 2018, **341**, 102-111.
7. P. Du, Y. Dong, H. Kang, X. Yang, Q. Wang, J. Niu, S. Wang and P. Liu, *ACS Sustainable Chemistry & Engineering*, 2018, **6**, 14723-14733.
8. C. Jin, H.-T. Wang, Y.-N. Liu, X.-H. Kang, P. Liu, J.-N. Zhang, L.-N. Jin, S.-W. Bian and Q. Zhu, *Electrochim. Acta*, 2018, **270**, 205-214.
9. Q. Zhang, N. Wang, P. Zhao, M. Yao and W. Hu, *Composites Part A: Applied Science and Manufacturing*, 2017, **98**, 58-65.
10. Z. Li, Y. Li, L. Wang, L. Cao, X. Liu, Z. Chen, D. Pan and M. Wu, *Electrochim. Acta*, 2017, **235**, 561-569.
